# Supplementary material for: Dimensional Accuracy and Clinical Value of 3D Printed Models in Congenital Heart Disease: A Systematic Review and Meta-Analysis
Source: J Clin Med. 2019 Sep 18;8(9):1483. doi: 10.3390/jcm8091483 (PMC6780783; doi:10.3390/jcm8091483)
Supplement: Supplementary file 1 [file jcm-08-01483-s001.pdf]

Supplementary Table S1: Quality assessment of RCTs

| Items                               | Ejaz 2013 | Loke 2017 | Su 2018 | Wang 2017 | White 2018 |
|-------------------------------------|-----------|-----------|---------|-----------|------------|
| Described as RCT                    | Yes       | Yes       | Yes     | Yes       | Yes        |
| Adequate randomization              | No        | No        | Yes     | No        | Yes        |
| Treatment allocation concealed      | No        | No        | Yes     | No        | Yes        |
| Participants and providers blinded  | Yes       | No        | Yes     | Yes       | Yes        |
| Outcomes assessors blinded          | No        | No        | No      | No        | Yes        |
| Similarity of groups at baseline    | No        | Yes       | Yes     | No        | Yes        |
| Drop-out rate < 20%                 | Yes       | Yes       | Yes     | Yes       | Yes        |
| Differential drop-out rate < 15%    | Yes       | Yes       | Yes     | Yes       | Yes        |
| Adherence to intervention protocols | Yes       | Yes       | Yes     | Yes       | Yes        |
| Avoid other interventions           | N/A       | N/A       | N/A     | N/A       | Yes        |
| Outcomes measures assessment        | Yes       | Yes       | Yes     | No        | Yes        |
| Power calculation                   | No        | No        | No      | No        | No         |
| Prespecified outcomes               | Yes       | Yes       | Yes     | Yes       | Yes        |
| Intent-to-treat analysis            | Yes       | Yes       | Yes     | Yes       | Yes        |
| Total of 'Yes'                      | 8         | 8         | 11      | 7         | 13         |
| Quality rating                      | Fair      | Fair      | Good    | Fair      | Good       |

RCT, randomised controlled trial; N/A, not available

Supplementary Table S2: Quality assessment of observational cohort and cross-sectional studies

| Items                                                                      | Biglino 2017a | Lau 2018 | Olivieri 2016 | Valverde 2017 | Zhao 2018 |
|----------------------------------------------------------------------------|---------------|----------|---------------|---------------|-----------|
| Research question                                                          | Yes           | Yes      | Yes           | Yes           | Yes       |
| Study population specified                                                 | Yes           | Yes      | Yes           | Yes           | Yes       |
| Participation rate >50%                                                    | Yes           | Yes      | Yes           | Yes           | Yes       |
| Groups recruited from the same population/<br>uniform eligibility criteria | Yes           | Yes      | Yes           | Yes           | Yes       |
| Sample size justification                                                  | No            | Yes      | No            | No            | No        |
| Exposure assessed before outcome measurement                               | Yes           | Yes      | Yes           | Yes           | Yes       |
| Sufficient timeframe to see an effect                                      | No            | No       | No            | Yes           | No        |
| Different levels of exposure examined                                      | No            | No       | No            | Yes           | No        |
| Exposure measures and assessment                                           | Yes           | Yes      | Yes           | Yes           | Yes       |
| Repeated exposure assessment                                               | No            | No       | Yes           | No            | No        |
| Outcomes measures                                                          | Yes           | Yes      | Yes           | Yes           | Yes       |
| Outcomes assessors blinded                                                 | No            | No       | No            | No            | No        |
| Follow-up rate                                                             | Yes           | Yes      | Yes           | Yes           | Yes       |
| Statistical analyses                                                       | No            | No       | No            | No            | No        |
| Total of 'Yes'                                                             | 8             | 9        | 9             | 10            | 8         |
| Quality rating                                                             | Fair          | Fair     | Fair          | Good          | Fair      |

Supplementary Table S3: Quality assessment of pre-post studies with no control group

| Items                                                                 | Costello 2015 |
|-----------------------------------------------------------------------|---------------|
| Research question                                                     | Yes           |
| Eligibility criteria and study population                             | No            |
| Study participants representative of clinical populations of interest | Yes           |
| All eligible participants enrolled                                    | No            |
| Sample size                                                           | No            |
| Intervention clearly described                                        | Yes           |
| Outcome measures clearly described, valid, and reliable               | Yes           |
| Outcomes assessors blinded                                            | No            |
| Follow-up rate                                                        | Yes           |
| Statistical analyses                                                  | Yes           |
| Multiple outcomes measures                                            | No            |
| Group-level interventions and individual-level outcome efforts        | Yes           |
| Total of 'Yes'                                                        | 7             |
| Quality rating                                                        | Fair          |

Supplementary Table S4: Quality assessment of case-control study

| Items                                        | Ryan 2018 |
|----------------------------------------------|-----------|
| Research question                            | Yes       |
| Study population                             | Yes       |
| Target population and case representation    | No        |
| Sample size justification                    | Yes       |
| Groups recruited from the same population    | Yes       |
| Inclusion/exclusion criteria                 | Yes       |
| Case and control definitions                 | No        |
| Random selection of study participants       | No        |
| Concurrent controls                          | Yes       |
| Exposure assessed before outcome measurement | Yes       |
| Exposure assessors blinded                   | No        |
| Statistical analyses                         | No        |
| Total of 'Yes'                               | 9         |
| Quality rating                               | Good      |

Supplementary Table S5: Quality assessment of case series studies

| Items                                                            | Bhatla<br>2017 | Garekar<br>2016 | Hoashi<br>2018 | Ma<br>2015 | McGovern<br>2017 | Ngan<br>2006 | Olejnik<br>2017 | Olivieri<br>2015 | Parimi<br>2018 | Riesenkampff<br>2009 | Schmauss<br>2015 | Shiraishi<br>2009 |
|------------------------------------------------------------------|----------------|-----------------|----------------|------------|------------------|--------------|-----------------|------------------|----------------|----------------------|------------------|-------------------|
| Research question                                                | Yes            | Yes             | Yes            | Yes        | Yes              | Yes          | Yes             | Yes              | Yes            | Yes                  | Yes              | Yes               |
| Study population<br>clearly described                            | Yes            | Yes             | Yes            | Yes        | Yes              | Yes          | Yes             | Yes              | Yes            | Yes                  | Yes              | Yes               |
| Case consecutive                                                 | Yes            | Yes             | Yes            | Yes        | Yes              | Yes          | Yes             | Yes              | Yes            | No                   | Yes              | No                |
| Comparable<br>subjects                                           | Yes            | Yes             | Yes            | Yes        | Yes              | Yes          | Yes             | Yes              | Yes            | Yes                  | Yes              | Yes               |
| Intervention<br>clearly described                                | Yes            | Yes             | Yes            | Yes        | Yes              | Yes          | Yes             | Yes              | Yes            | Yes                  | Yes              | Yes               |
| Outcome<br>measures clearly<br>described, valid,<br>and reliable | Yes            | Yes             | Yes            | Yes        | Yes              | Yes          | Yes             | Yes              | Yes            | Yes                  | Yes              | No                |
| Follow-up rate                                                   | Yes            | Yes             | Yes            | Yes        | Yes              | Yes          | Yes             | No               | No             | No                   | Yes              | No                |
| Statistical<br>methods<br>described                              | No             | No              | No             | Yes        | No               | No           | Yes             | Yes              | Yes            | No                   | No               | No                |
| Results well<br>described                                        | Yes            | Yes             | Yes            | Yes        | Yes              | Yes          | Yes             | Yes              | Yes            | Yes                  | Yes              | No                |
| Total of 'Yes'                                                   | 8              | 8               | 8              | 9          | 8                | 8            | 9               | 8                | 8              | 6                    | 8                | 4                 |
| Quality rating                                                   | Good           | Good            | Good           | Good       | Good             | Good         | Good            | Good             | Good           | Fair                 | Good             | Fair              |
